# Supplementary material for: Phosphine Catalyzed Michael-Type Additions: Synthesis of Glutamic Acid Derivatives from Arylidene-α-Amino Esters
Source: Preprints.org preprint supplement (doi:10.20944/preprints202312.1267.v1), 2023-12-18
Supplement: Supplementary file 1 [file supplementary]

**Phosphine Catalyzed Michael-Type Additions: Synthesis of Glutamic Acid derivatives from** **arylidene-α-amino esters**

Lesly V. Rodríguez-Flórez,a María González-Marcos,a Eduardo García-Mingüens,a,b Gracia Retamosa,a Misa Kawase,a Elisabet Selvab and José M. Sansano,a*

*Dedicated to the memory of Prof. David A. Evans*

*a Departamento de Química Orgánica, Centro de Innovación en Química Avanzada (ORFEO-CINQA) and Institute of Organic Synthesis. Universidad de Alicante. Ctra. Alicante-San Vicente s/n, 03080-Alicante, Spain.*

*b Medalchemy, S. L. Ancha de Castelar, 46-48, entlo. A. San Vicente del Raspeig, 03690-Alicante (Spain).*

Table of Contents

**1. NMR copies**……………………………………………………………………. S1

**2. REPRESENTATIVE FTIR COPIES** ………………………………………….. s29

**1. NMR COPIES**

**Figure S1**, 1H NMR of compound **3a**

**
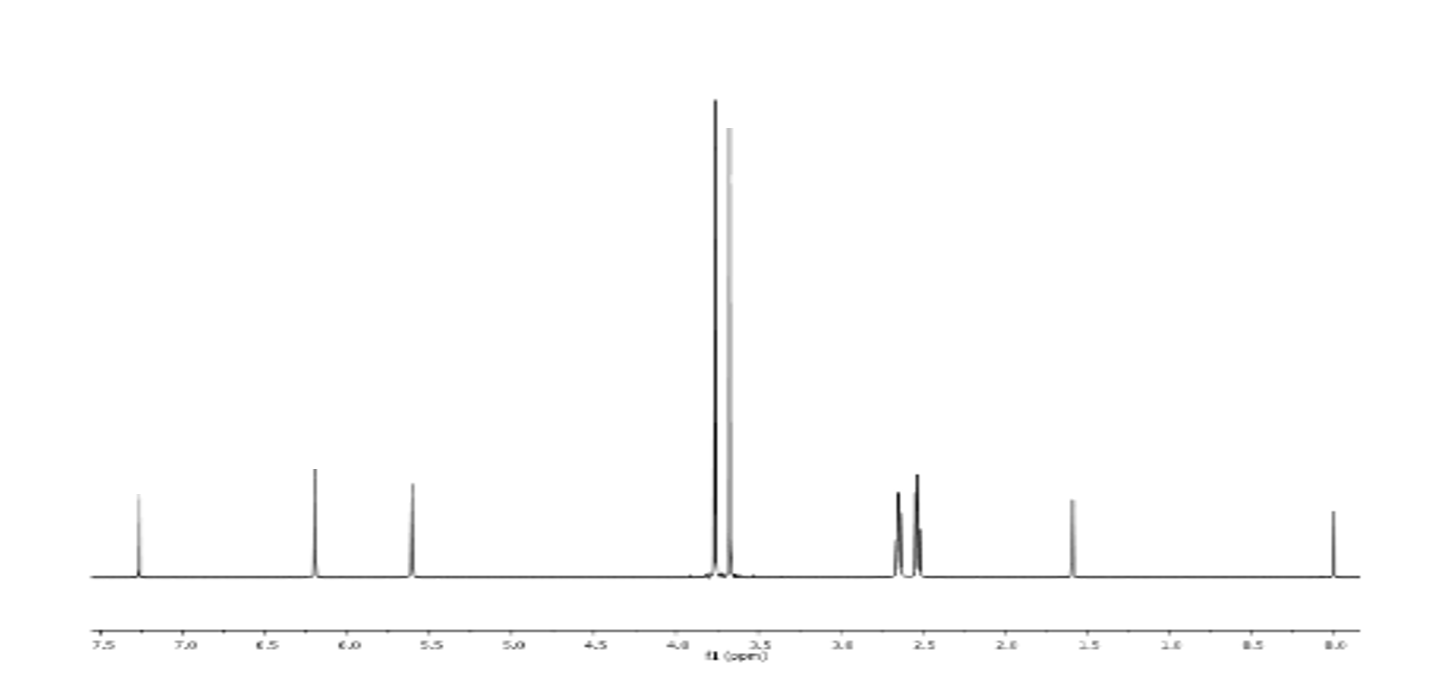
**

**Figure S2**, 1H NMR of compound **4**


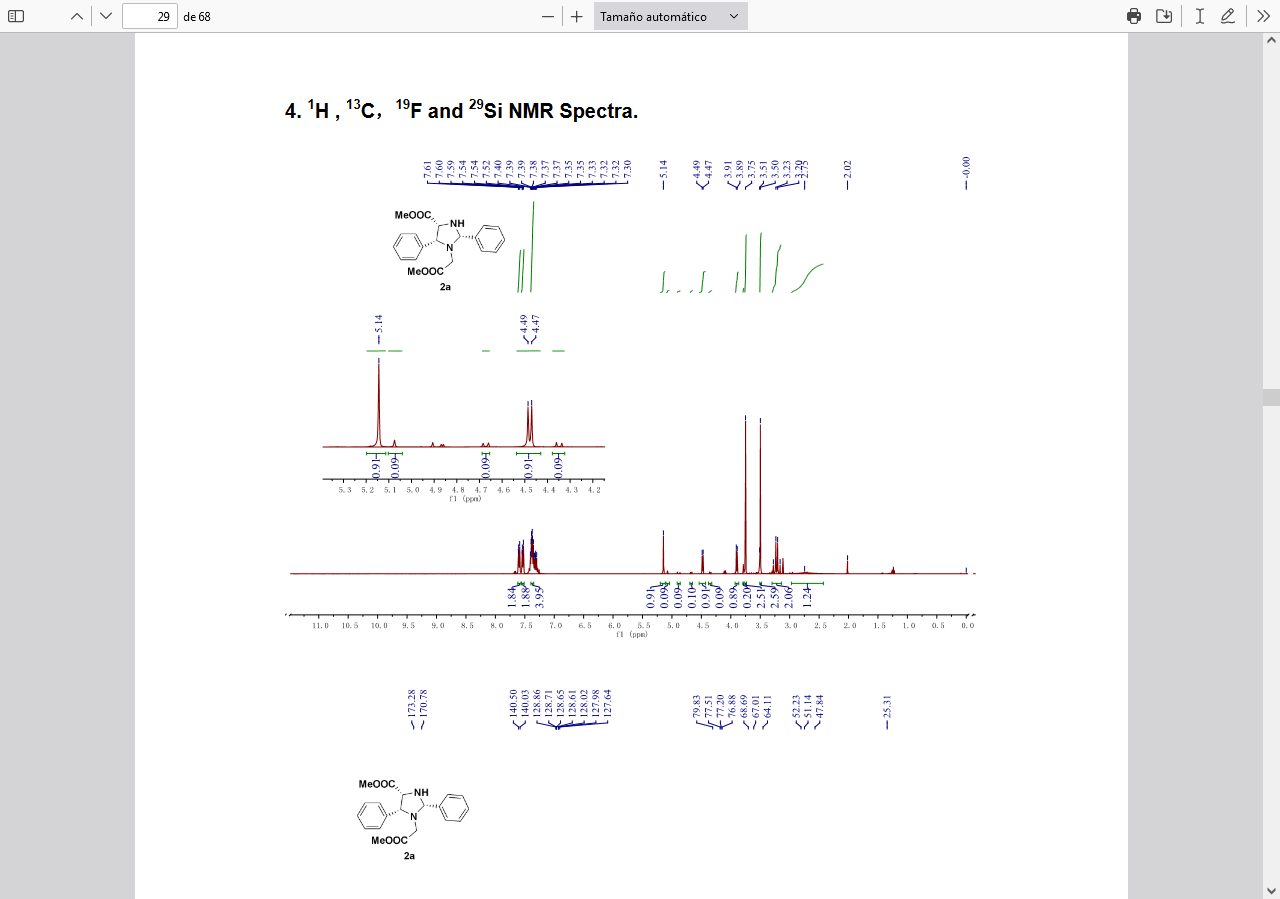


**Figure S3**, 1H NMR of compound **5**

**Figure S4**, 1H NMR of compound **2a**

**Figure S5**, 13C NMR of compound **2a**

**Figure S6**, 1H NMR of compound **2b**

**Figure S7**, 13C NMR of compound **2b**

**Figure S8**, 1H NMR of compound **2c**

**Figure S9**, 13C NMR of compound **2c**

**Figure S10**, 1H NMR of compound **2d**

**Figure S11**, 13C NMR of compound **2d**

**Figure S12**, 1H NMR of compound **2e**

**Figure S13**, 13C NMR of compound **2e**

**Figure S14**, 1H NMR of compound **2f**

**Figure S15**, 13C NMR of compound **2f**

**Figure S16**, 1H NMR of compound **2g**

**Figure S17**, 13C NMR of compound **2g**

**Figure S18**, 1H NMR of compound **2h**

**Figure S19**, 13C NMR of compound **2h**

**Figure S20**, 1H NMR of compound **2i**

**Figure S21**, 13C NMR of compound **2i**

**Figure S22**, 1H NMR of compound **2j**

**Figure S23**, 13C NMR of compound **2j**

**Figure S24**, 1H NMR of compound **2k**

**Figure S25**, 13C NMR of compound **2k**

**Figure S26**, 1H NMR of compound **2l**

**Figure S27**, 13C NMR of compound **2l**

**Figure S28**, 1H NMR of compound **2m**

**Figure S29**, 13C NMR of compound **2m**

**Figure S30**, 1H NMR of compound **2n**

**Figure S31**, 13C NMR of compound **2n**

**Figure S32**, 1H NMR of compound **2o**

**Figure S33**, 13C NMR of compound **2o**

**Figure S34**, 1H NMR of compound **2p**

**Figure S35**, 13C NMR of compound **2p**

**Figure S36**, 1H NMR of compound **2q**

**Figure S37**, 13C NMR of compound **2q**

**Figure S38**, 1H NMR of compound **2u**

**Figure S39**, 13C NMR of compound **2u**

**Figure S40**, 1H NMR of compound **6v**

**Figure S41**, 13C NMR of compound **6v**

**Figure S42**, 1H NMR of compound **8a**

**Figure S43**, 13C NMR of compound **8a**

**Figure S44**, 1H NMR of compound **8b**

**Figure S45**, 13C NMR of compound **8b**

**Figure S46**, 1H NMR of compound **8c**

**Figure S47**, 13C NMR of compound **8c**

**Figure S48**, 1H NMR of compound **8d**

**Figure S49**, 13C NMR of compound **8d**

**Figure S50**, 1H NMR of compound **8e**

**Figure S51**, 13C NMR of compound **8e**

**Figure S52**, 1H NMR of compound **8f**

**Figure S53**, 13C NMR of compound **8f**

**Figure S54**, 1H NMR of compound **9**

**Figure S55**, 13C NMR of compound **9**

**2. REPRESENTATIVE FTIR COPIES**


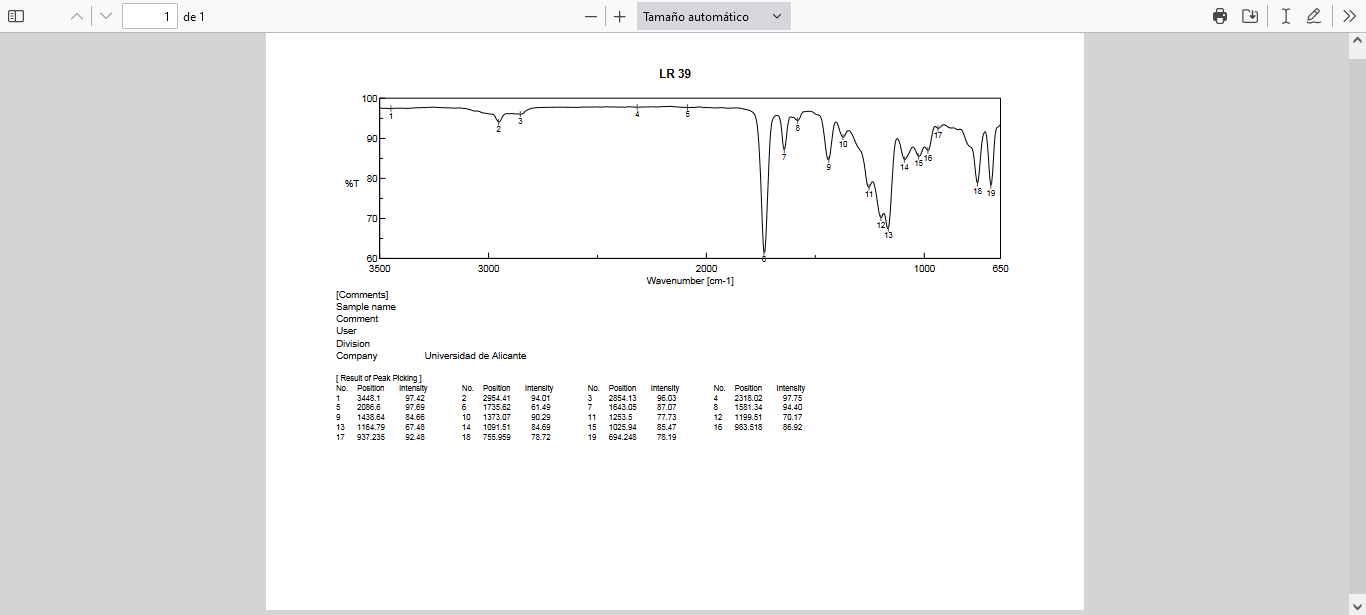


**Figure S56**, FTIR of compound **2a**


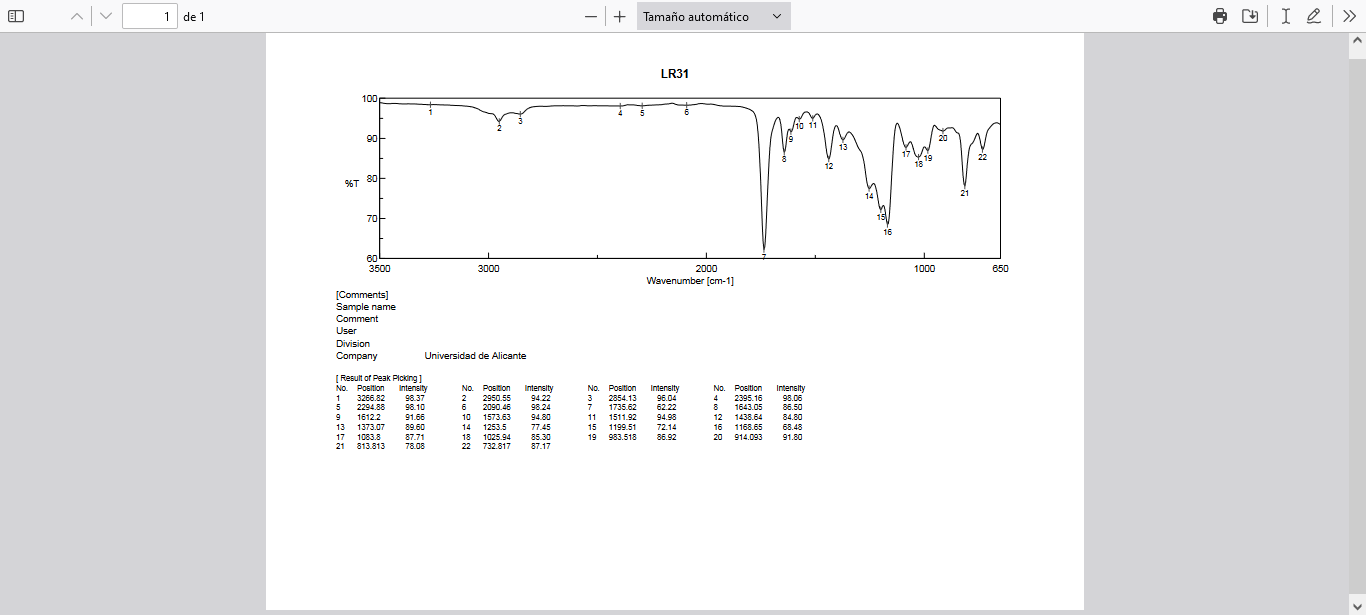


**Figure S57**, FTIR of compound **2b**


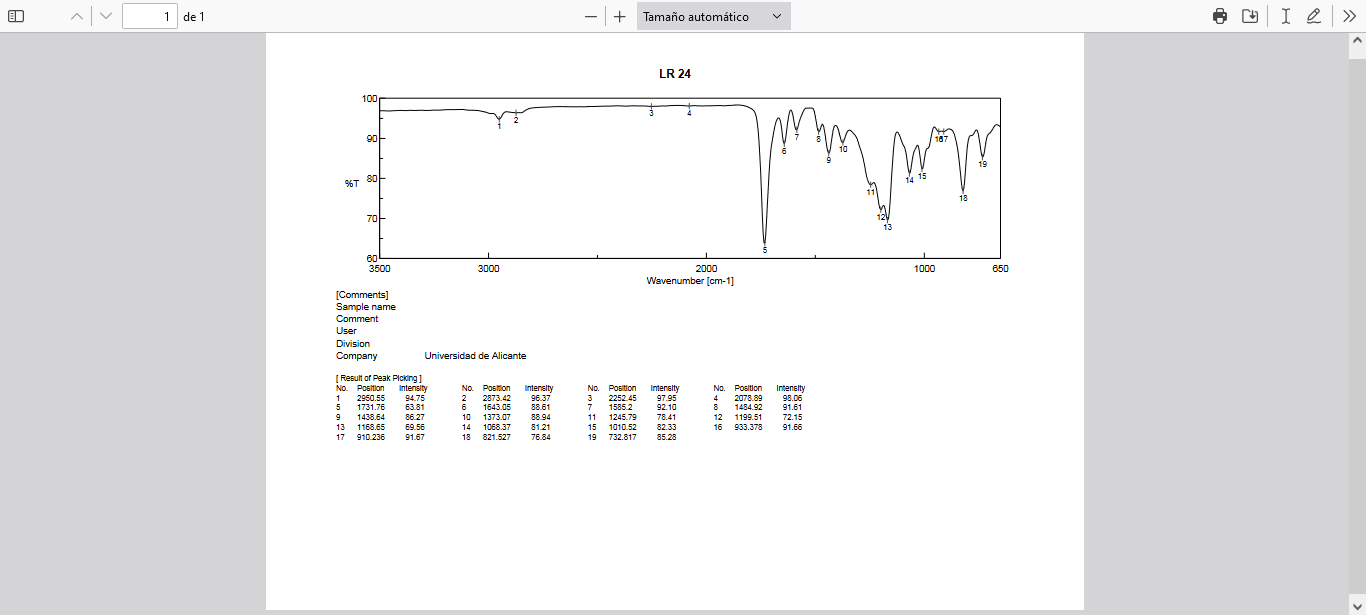


**Figure S58**, FTIR of compound **2g**


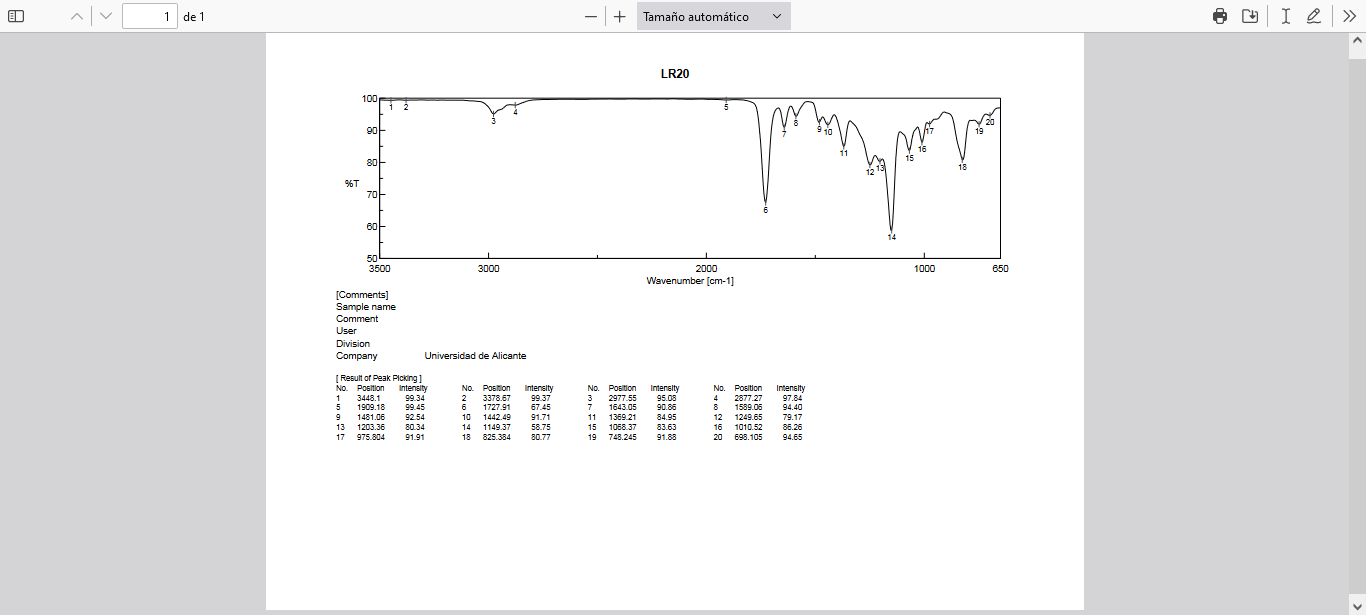


**Figure S59**, FTIR of compound **2h**


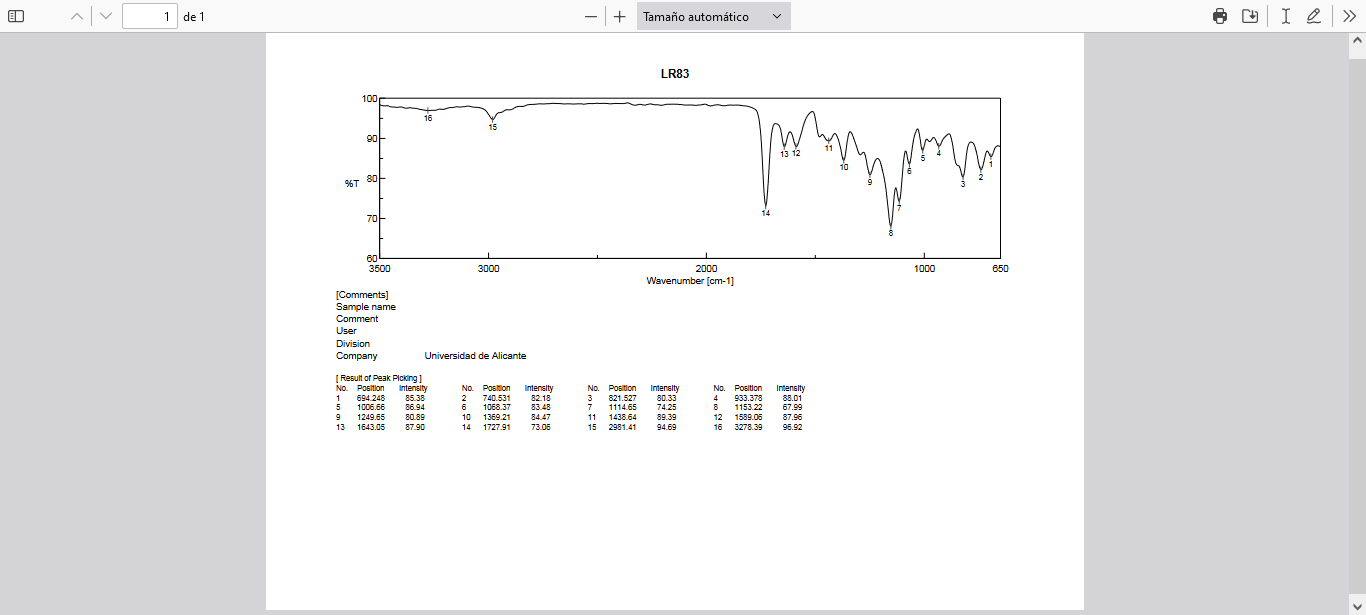


**Figure S60**, FTIR of compound **2m**


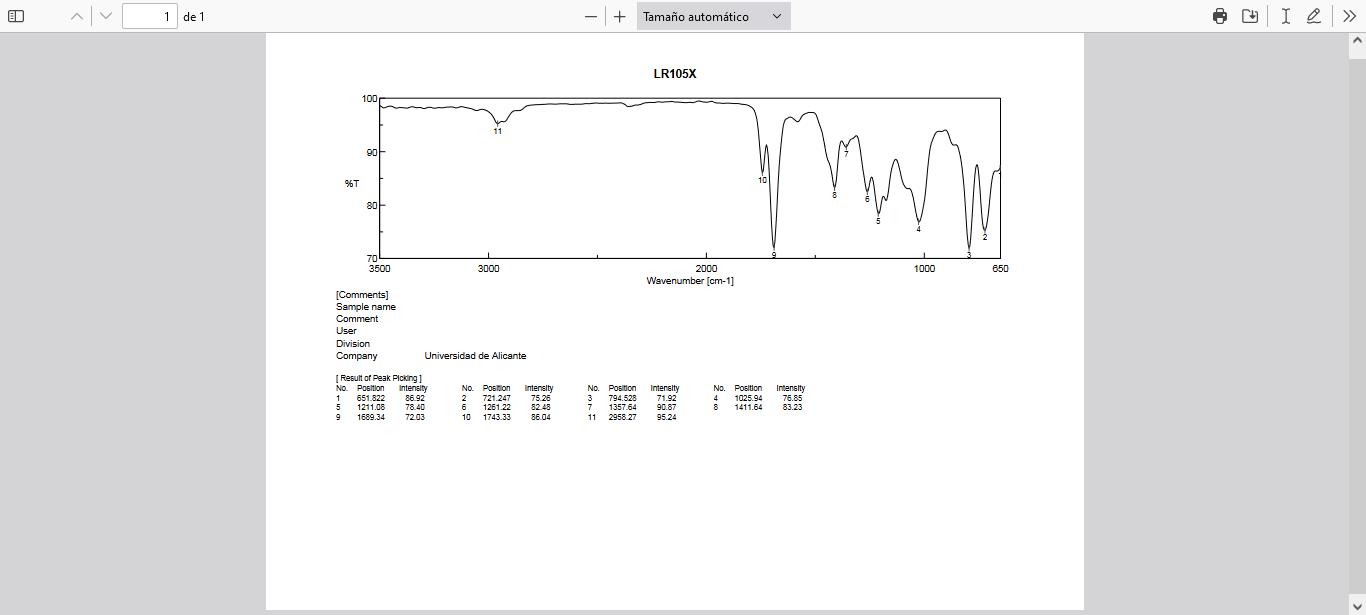


**Figure S61**, FTIR of compound **8a**


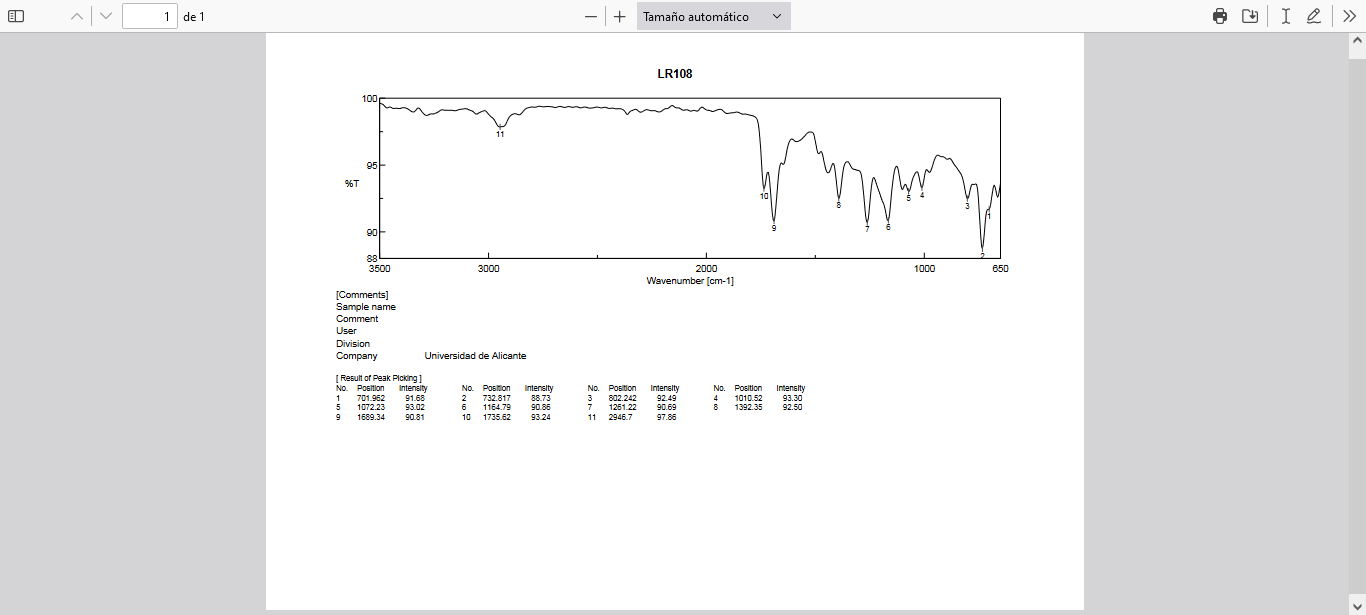


**Figure S62**, FTIR of compound **8b**


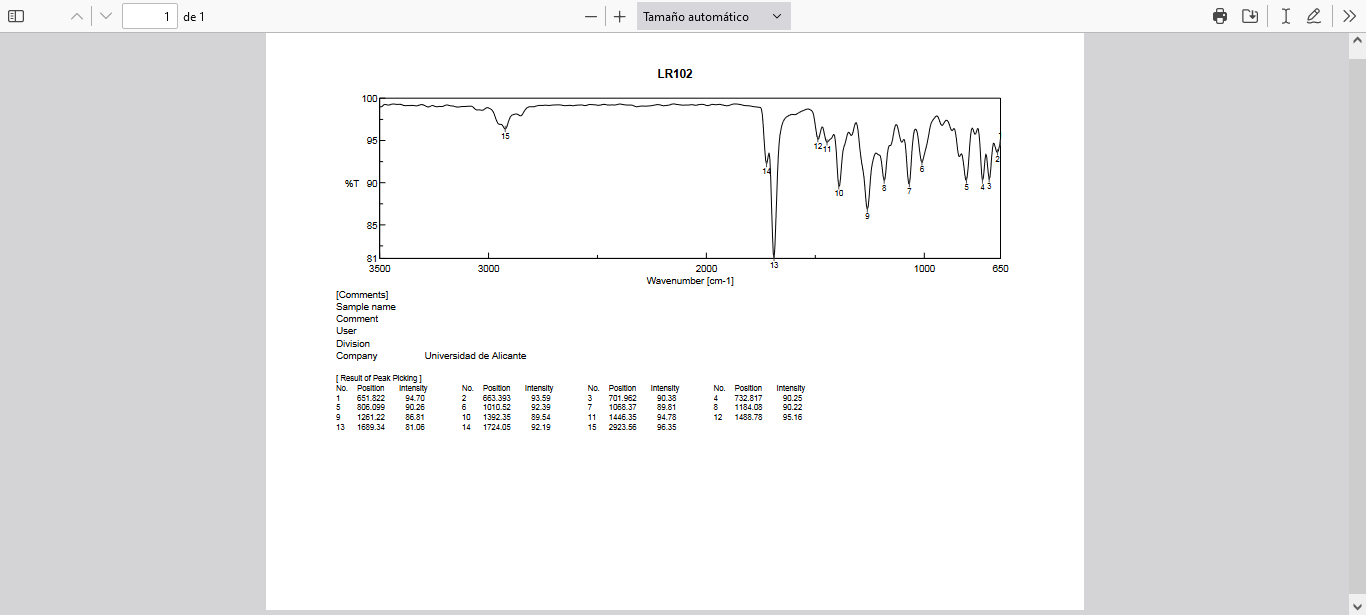


**Figure S63**, FTIR of compound **8c**


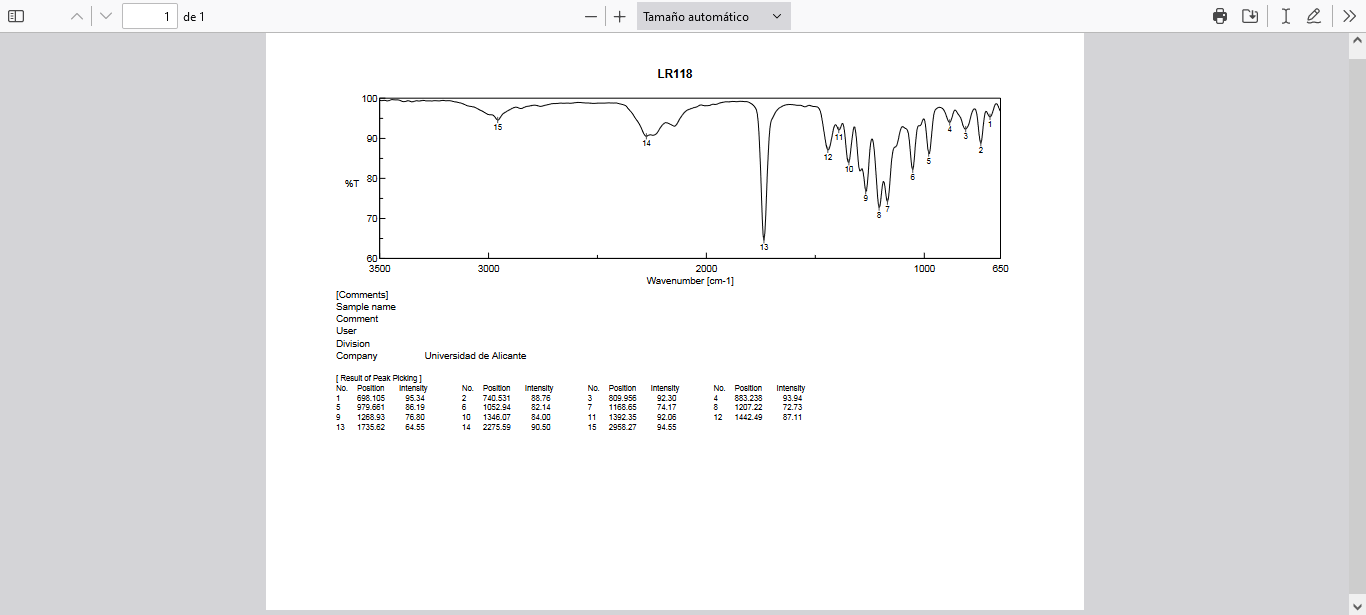


**Figure S64**, FTIR of compound **9**
